# Supplementary material for: Novel Insights Into Rheumatoid Arthritis Through Characterization of Concordant Changes in DNA Methylation and Gene Expression in Synovial Biopsies of Patients With Differing Numbers of Swollen Joints
Source: PubMed Central journal article supplement (PMC8100206; doi:10.3389/fimmu.2021.651475), 2021-04-22

**a** DNA methylation (no sample 33)  
 $R^2 = 0.4$  , p-value = 8.4E-03

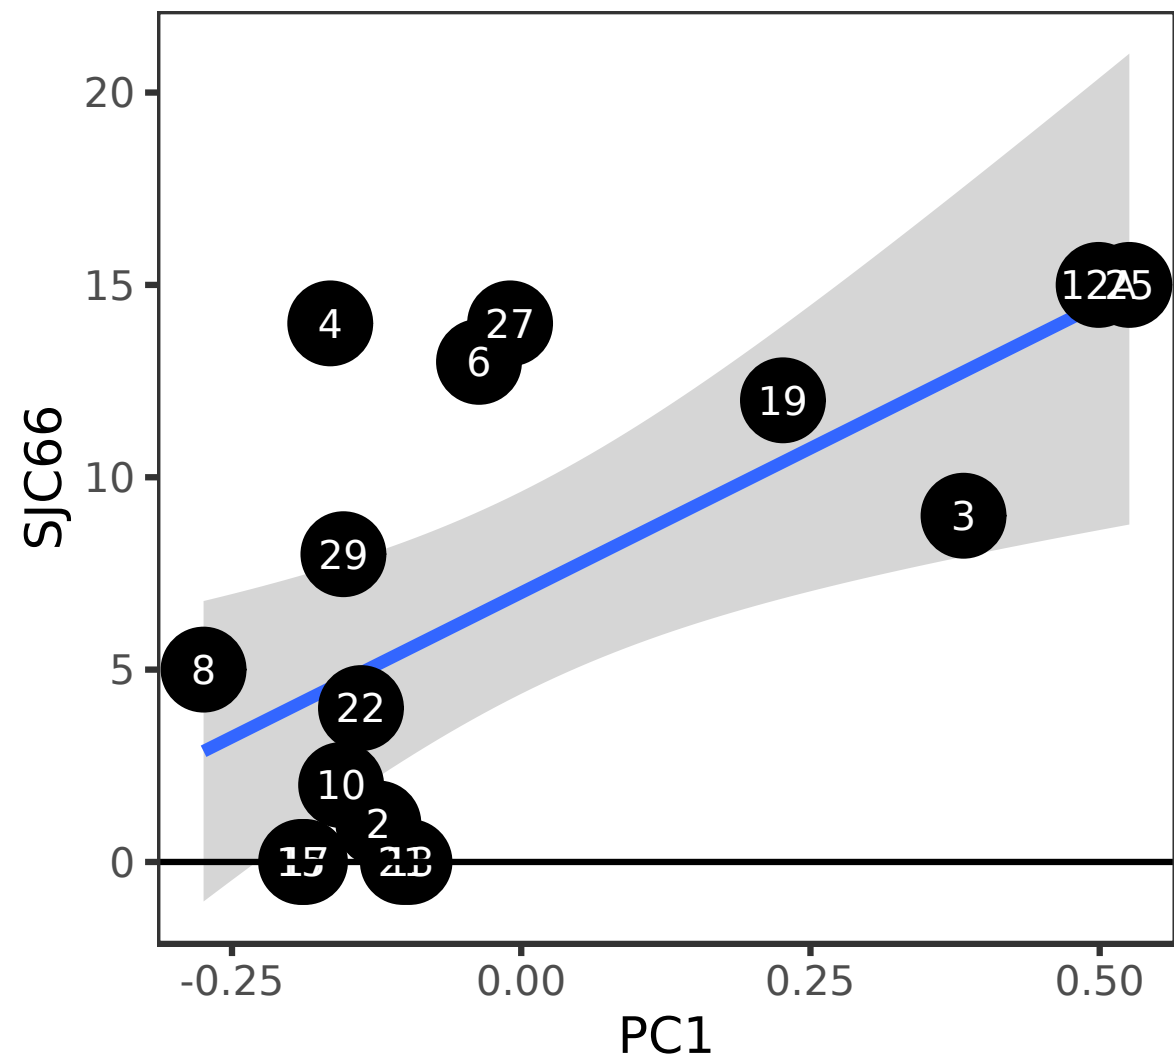

**b** Gene expression (no sample 33)  
 $R^2 = 0.4$  , p-value = 8.4E-03

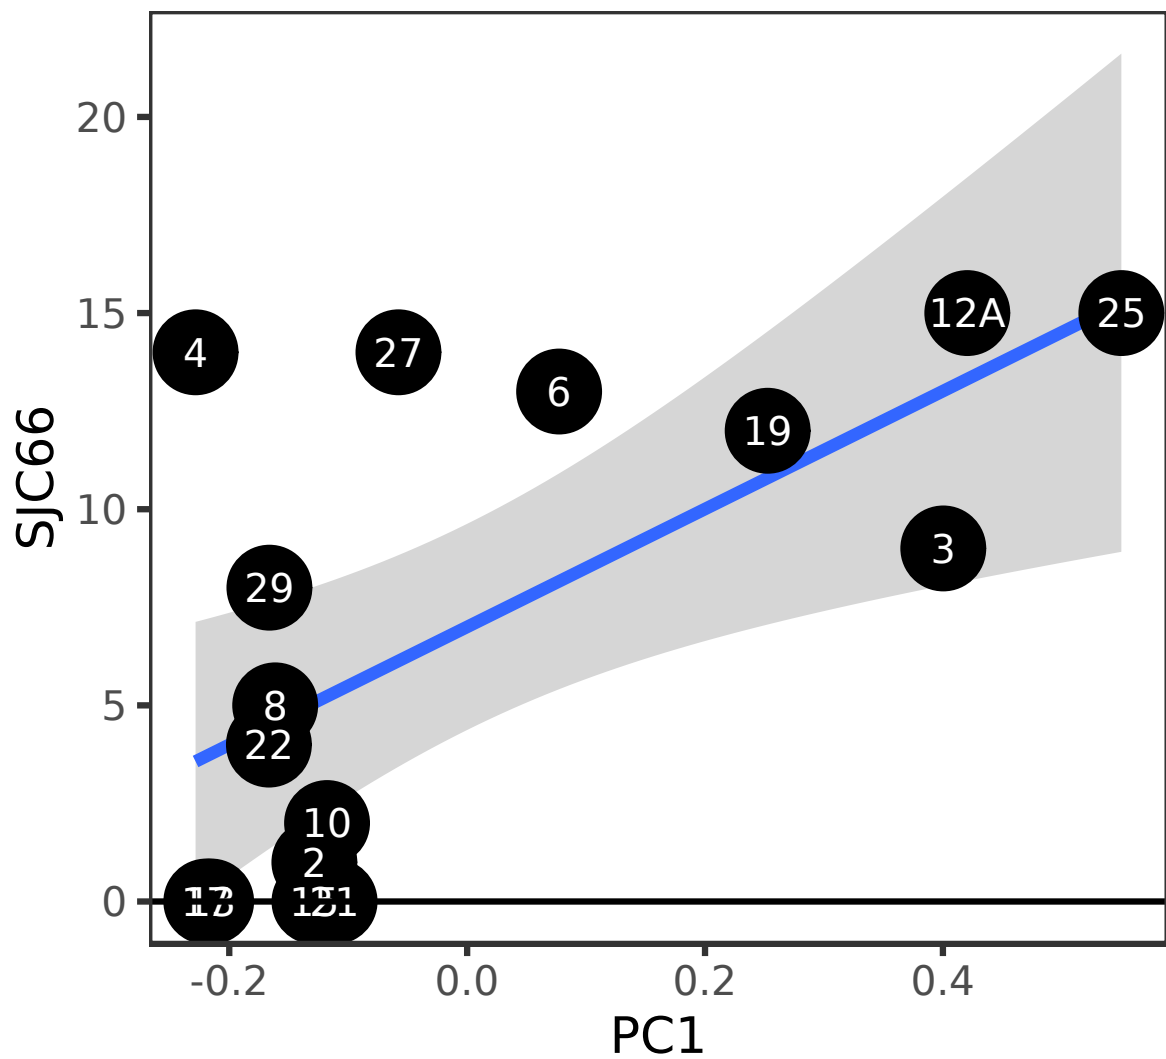

Supplement: Image_1.pdf [file Image_1.pdf]
