# Supplementary material for: Novel Insights Into Rheumatoid Arthritis Through Characterization of Concordant Changes in DNA Methylation and Gene Expression in Synovial Biopsies of Patients With Differing Numbers of Swollen Joints
Source: PubMed Central journal article supplement (PMC8100206; doi:10.3389/fimmu.2021.651475), 2021-04-22

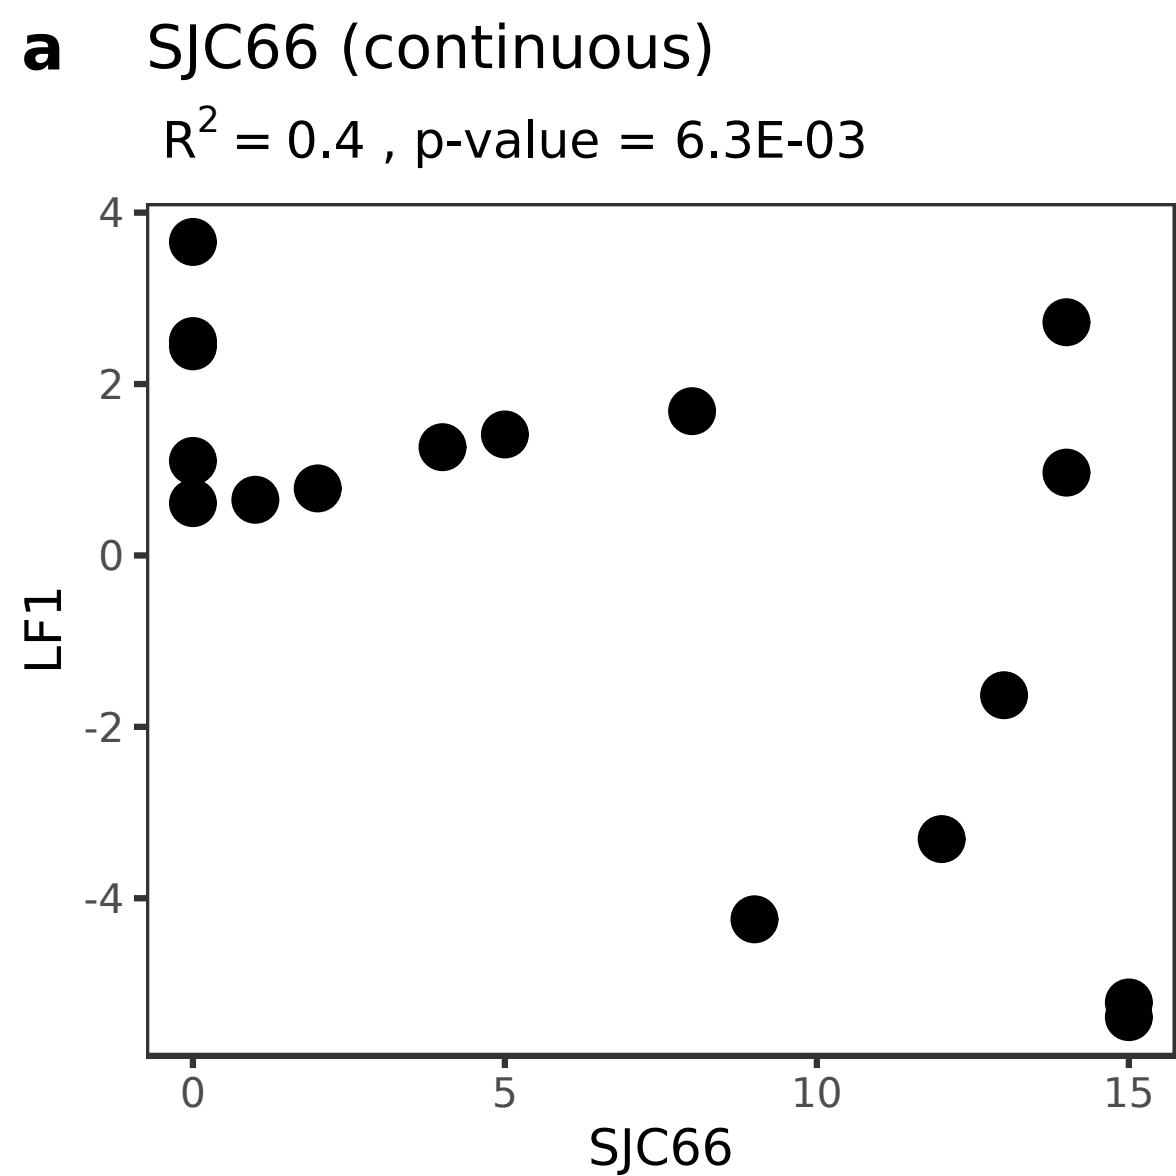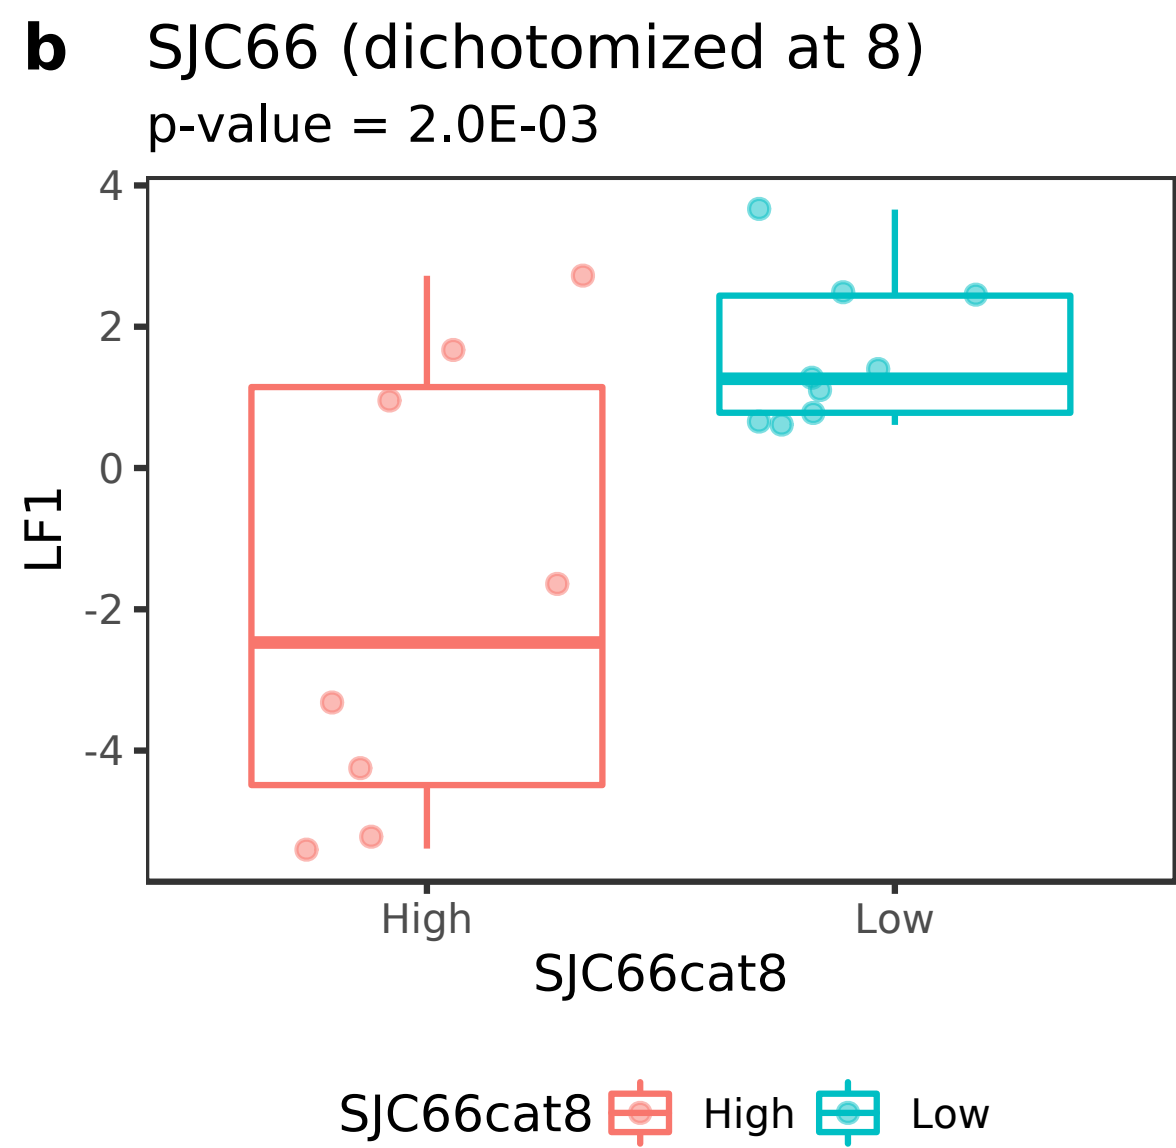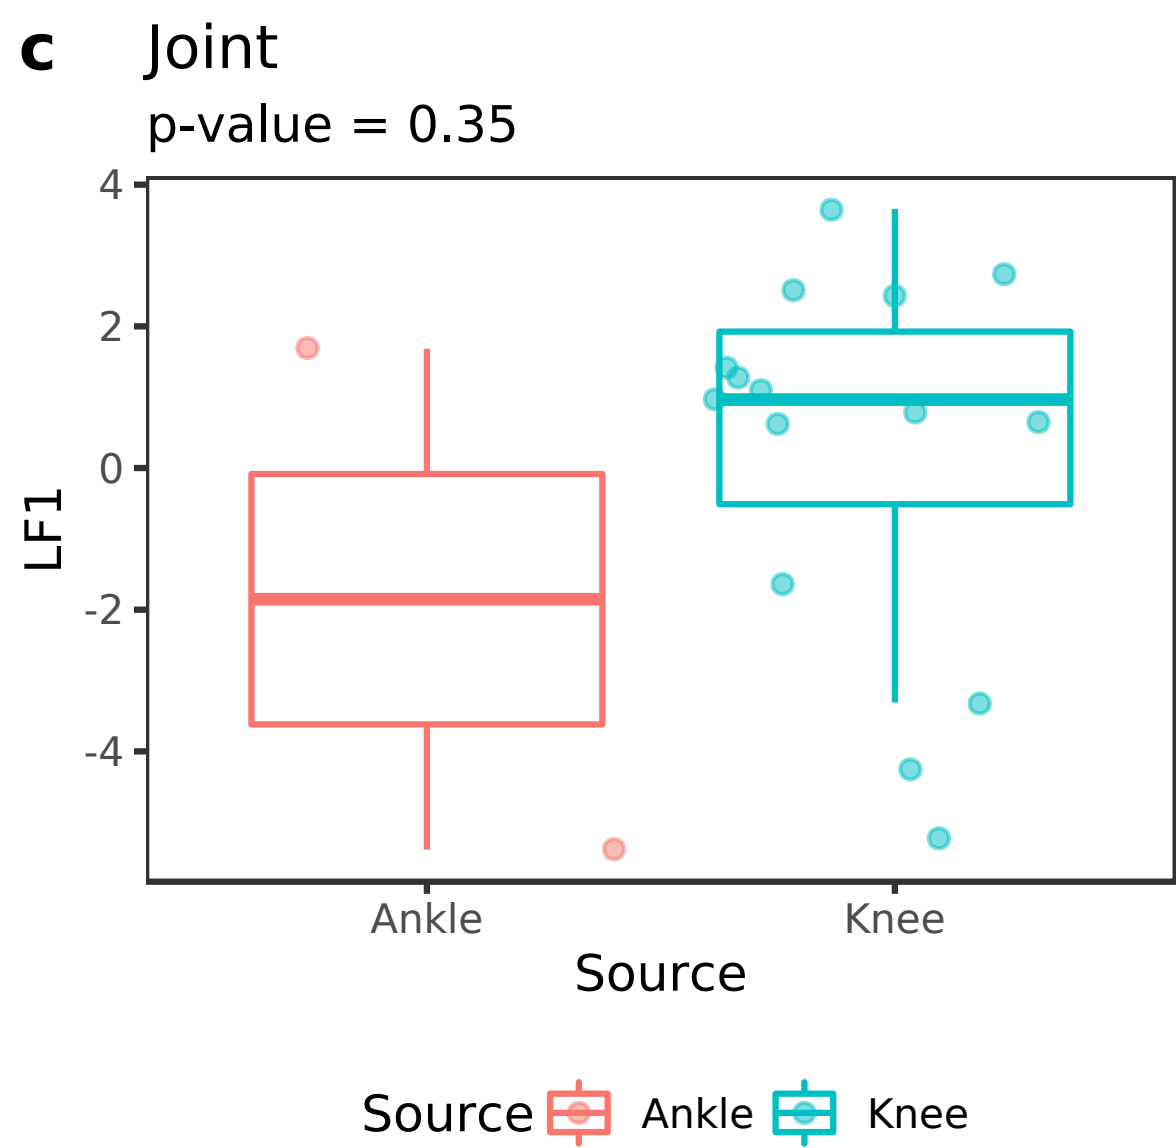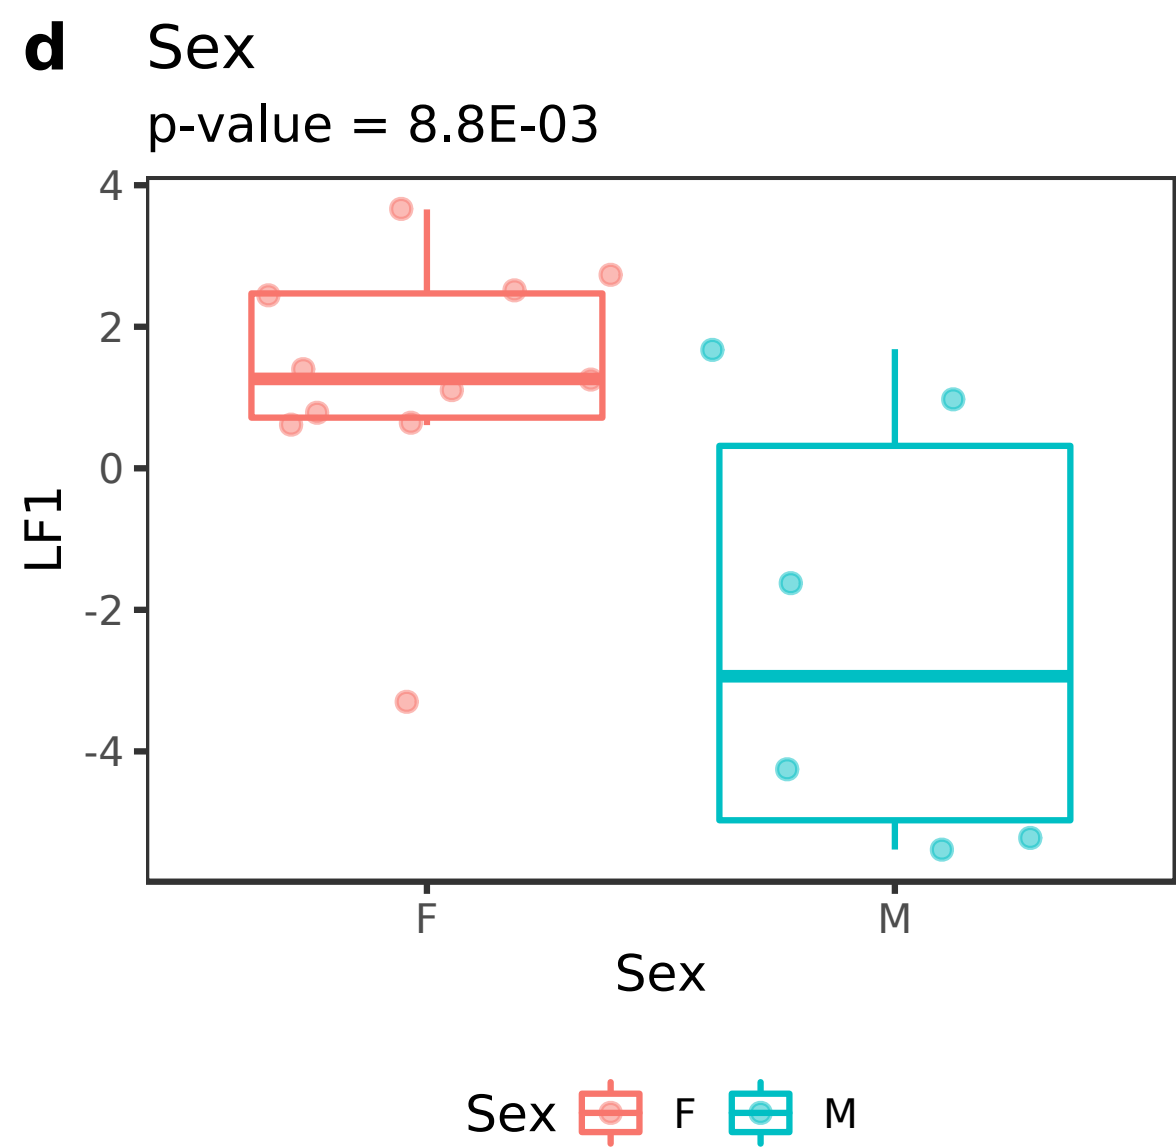

Supplement: Image_2.pdf [file Image_2.pdf]
