# Supplementary material for: Novel Insights Into Rheumatoid Arthritis Through Characterization of Concordant Changes in DNA Methylation and Gene Expression in Synovial Biopsies of Patients With Differing Numbers of Swollen Joints
Source: Front Immunol. 2021 Apr 22;12:651475. doi: 10.3389/fimmu.2021.651475 (PMC8100206; doi:10.3389/fimmu.2021.651475)
Supplement: Supplementary file 4 [file Table_1.xlsx]

## Sheet: Sorted by AMC trial
Sample name	Gender	Trial	Age (years)	Erosive disease	RF	ACPA	CCP titer (kAU/L)	ESR (mm/Hr)	CRP (mg/L)	DAS28	VAS disease activity (mm)	TJC66	SJC66	Joint	DMARD
2	F	Synoviomics	58	no	positive	positive	449	35	28.3	5.08	85	4	1	Knee	DMARD
15	F	Synoviomics	21	no	positive	negative	1	7	21.8	1.57	15	2	0	Knee	DMARD
17	F	Synoviomics	34	no	negative	negative	1	2	0.6	3.82	78	22	0	Knee	DMARD
3	M	Synoviomics	63	yes	positive	positive	1647	55	64.7	6.46	88	8	9	Knee	None
4	F	Synoviomics	21	no	negative	negative	1	7	4.5	5.41	94	44	14	Knee	None
19	F	Synoviomics	71	no	positive	negative	13	46	1.7	6.18	70	17	12	Knee	None
21	F	Synoviomics	21	no	negative	negative	1	8	1.1	5.01	94	43	0	Knee	DMARD
22	F	Synoviomics	56	no	negative	negative	17	21	5.1	6.3	54	56	4	Knee	None
12A	M	Synoviomics	82	no	negative	negative	1	91	114	5.99	12	8	15	Ankle	None
6	M	Pre-synoviomics	58	no	positive	positive	13052	12	11.7	5.36	66	14	13	Knee	None
8	F	Pre-synoviomics	53	no	positive	positive	119	12	5.4	5.13	76	21	5	Knee	None
10	F	Pre-synoviomics	45	yes	positive	negative	1	10	3.4	4.22	53	21	2	Knee	None
13	F	Pre-synoviomics	22	no	positive	positive	3826	20	1	2.97	62	0	0	Knee	None
25	M	Synoviomics II	29	yes	positive	negative	3	19	64.1	6.66	81	33	15	Knee	None
27	M	Synoviomics II	45	yes	positive	negative	13	77	46	7.11	83	13	14	Knee	DMARD
29	M	Synoviomics II	56	no	negative	negative	1	9	1	4.11	57	30	8	Ankle	DMARD
33	F	Synoviomics II	57	no	negative	positive	305	4	1.9	1.87	8	11	0	Knee	DMARD
